# Supplementary material for: Genome Analysis of Clostridium difficile PCR Ribotype 014 Lineage in Australian Pigs and Humans Reveals a Diverse Genetic Repertoire and Signatures of Long-Range Interspecies Transmission
Source: PubMed Central journal article supplement (PMC5225093; doi:10.3389/fmicb.2016.02138), 2017-01-11
Supplement: Image1.pdf [file Image1.pdf]

## Supplementary Material

**Knight DR\*, Squire MM, Collins DA and Riley TV (2016).** Genome analysis of *Clostridium difficile* PCR ribotype 014 lineage in Australian pigs and humans reveals a diverse genetic repertoire and signatures of long-range interspecies transmission. *Front. Microbiol.* **7**:2138. doi: 10.3389/fmicb.2016.02138

\*Correspondence: Daniel R. Knight; [daniel.knight@uwa.edu.au](mailto:daniel.knight@uwa.edu.au)

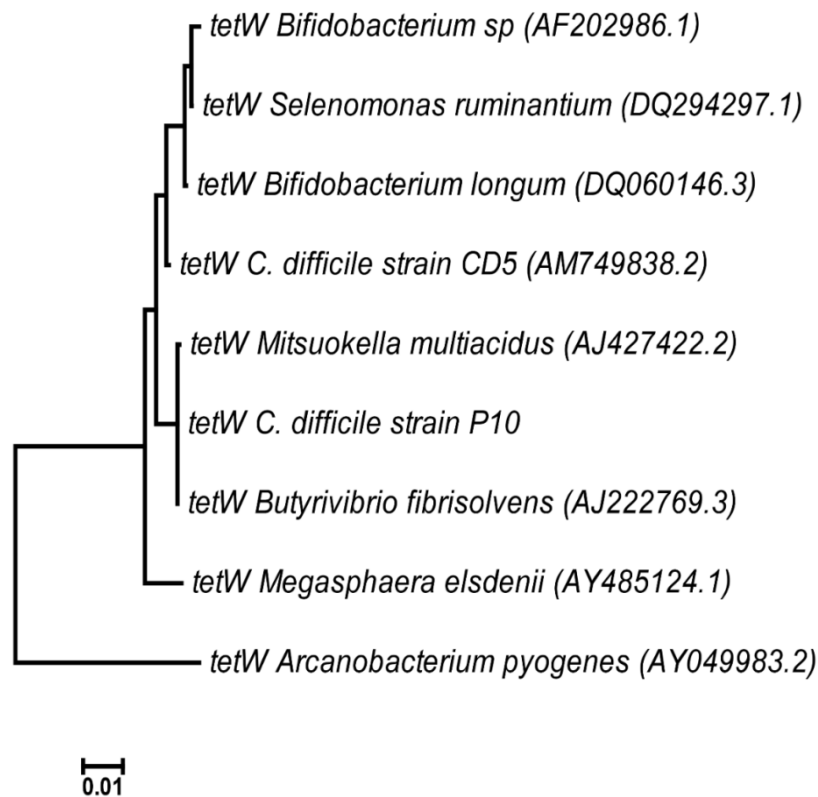

### Supplementary Image 1 | *tetW* phylogeny

Mid-point rooted Neighbor-Joining tree generated from *tetW* nucleotide sequences (1920bp) from *C. difficile* strain P10 (representative of all *tetW* positive genomes,  $n=8$ ) and seven homologous elements in related species.
