# Supplementary material for: Genome Analysis of Clostridium difficile PCR Ribotype 014 Lineage in Australian Pigs and Humans Reveals a Diverse Genetic Repertoire and Signatures of Long-Range Interspecies Transmission
Source: PubMed Central journal article supplement (PMC5225093; doi:10.3389/fmicb.2016.02138), 2017-01-11
Supplement: Image3.pdf [file Image3.pdf]

## Supplementary Material

**Knight DR\*, Squire MM, Collins DA and Riley TV (2016).** Genome analysis of *Clostridium difficile* PCR ribotype 014 lineage in Australian pigs and humans reveals a diverse genetic repertoire and signatures of long-range interspecies transmission. *Front. Microbiol.* **7**:2138. doi: 10.3389/fmicb.2016.02138

\*Correspondence: Daniel R. Knight; [daniel.knight@uwa.edu.au](mailto:daniel.knight@uwa.edu.au)

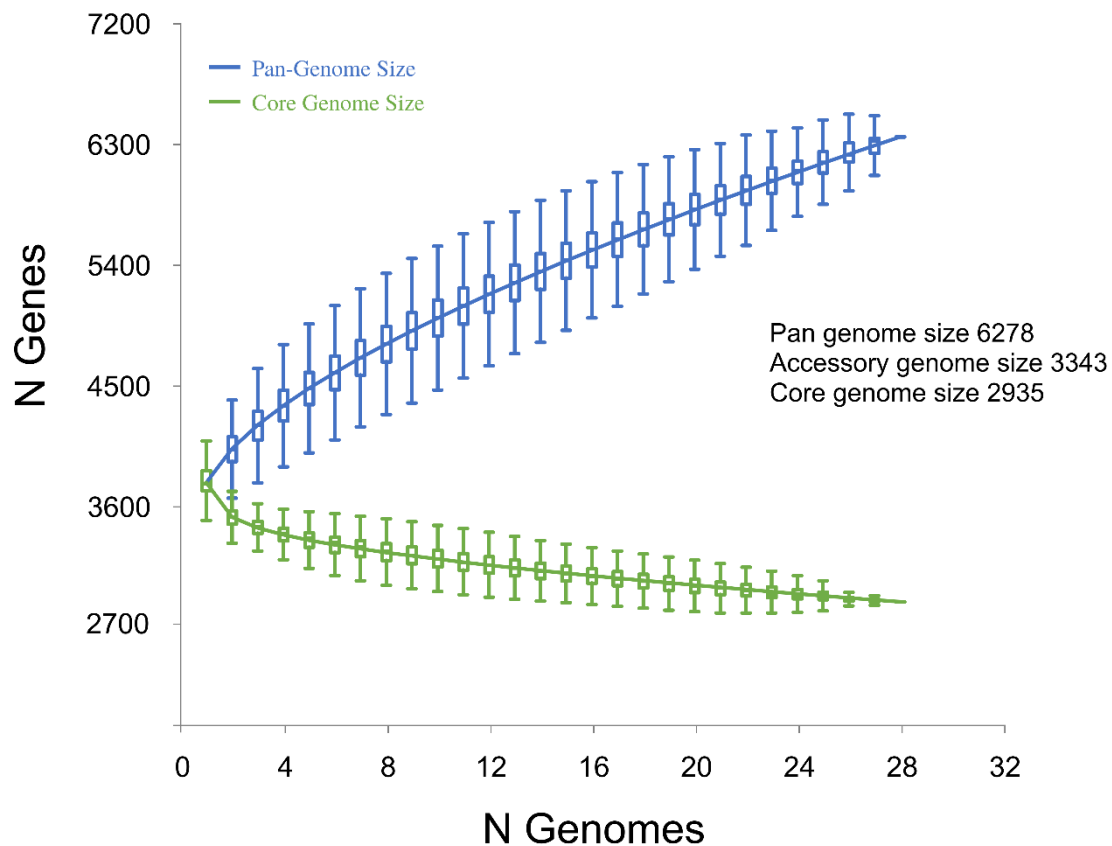

### Supplementary Image 3 | Pan-genome analysis of *C. difficile* RT014 from humans

The total number of genes in the pan (blue) and core (green) genomes from humans ( $n=28$ ) are plotted as a function of the number of genomes sequentially added (see Methods and manuscript Figure 6 for details).
