# Supplementary material for: Genome Analysis of Clostridium difficile PCR Ribotype 014 Lineage in Australian Pigs and Humans Reveals a Diverse Genetic Repertoire and Signatures of Long-Range Interspecies Transmission
Source: PubMed Central journal article supplement (PMC5225093; doi:10.3389/fmicb.2016.02138), 2017-01-11
Supplement: Image5.pdf [file Image5.pdf]

## Supplementary Material

**Knight DR\*, Squire MM, Collins DA and Riley TV (2016).** Genome analysis of *Clostridium difficile* PCR ribotype 014 lineage in Australian pigs and humans reveals a diverse genetic repertoire and signatures of long-range interspecies transmission. *Front. Microbiol.* **7**:2138. doi: 10.3389/fmicb.2016.02138

\*Correspondence: Daniel R. Knight; [daniel.knight@uwa.edu.au](mailto:daniel.knight@uwa.edu.au)

|       |                                  |       |
|-------|----------------------------------|-------|
| 6278  | Pan genome size (CDS)            | 5688  |
| 2941  | Number of CDS identified by KEGG | 2825  |
| 46.85 | % CDS identified by KEGG         | 49.67 |

### KEGG functional characterisation

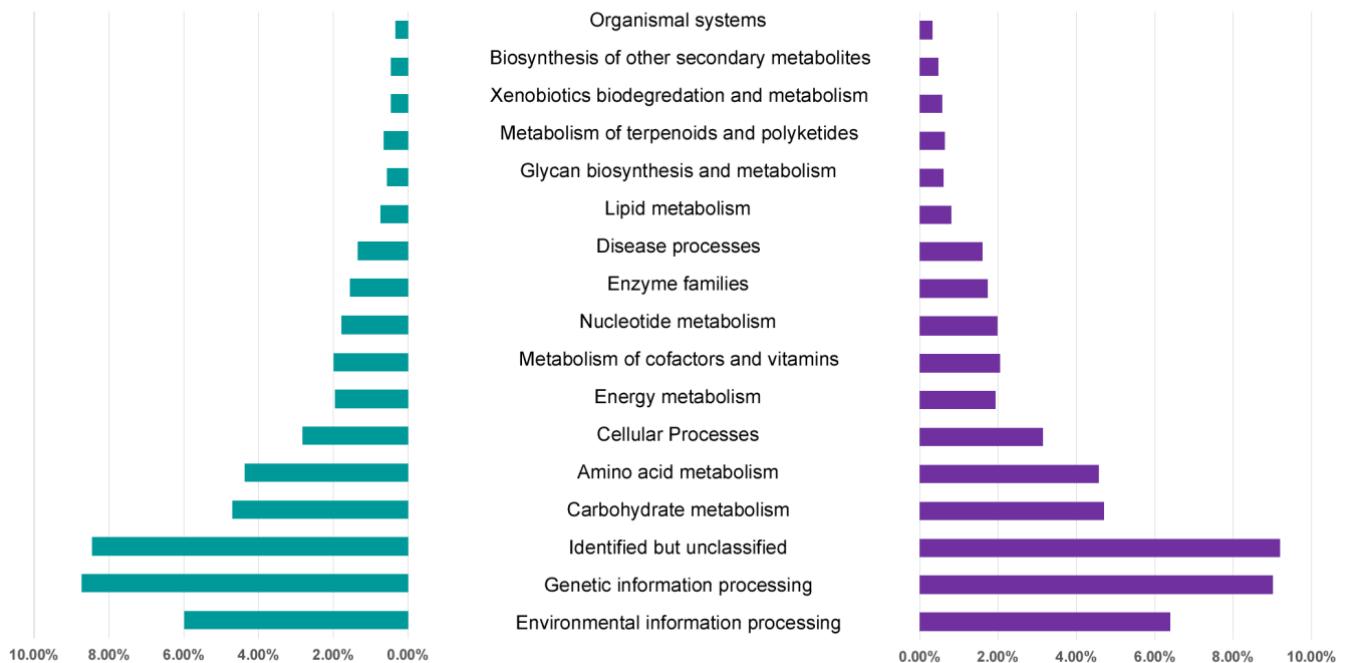

### Supplementary Image 5 | Proteome analysis of *C. difficile* RT014

Comparison of proteomic profiles for human (teal) and porcine (purple) RT014 pan-genomes. Near identical proteomic profiles were obtained for human and porcine groups ( $\leq 0.75\%$  difference in any of the 17 functional categories).
