# Supplementary material for: Genome Analysis of Clostridium difficile PCR Ribotype 014 Lineage in Australian Pigs and Humans Reveals a Diverse Genetic Repertoire and Signatures of Long-Range Interspecies Transmission
Source: PubMed Central journal article supplement (PMC5225093; doi:10.3389/fmicb.2016.02138), 2017-01-11
Supplement: Table1.pdf [file Table1.pdf]

## Supplementary Material

**Knight DR\*, Squire MM, Collins DA and Riley TV (2016).** Genome analysis of *Clostridium difficile* PCR ribotype 014 lineage in Australian pigs and humans reveals a diverse genetic repertoire and signatures of long-range interspecies transmission. *Front. Microbiol.* **7**:2138.  
doi: 10.3389/fmicb.2016.02138

\*Correspondence: Daniel R. Knight; [daniel.knight@uwa.edu.au](mailto:daniel.knight@uwa.edu.au)

**Supplementary Table 1 | Metrics for *C. difficile* RT014 genomes, n=44**

| ID  | Genome size (bp) | GC%   | N genes | N CDS | CDS Length | Min CDS length | Max CDS length | N tRNA | N rRNA | N CRISPR | Total CDS Length (Mbp) | Coding % | Coding density (CDS/Mbp) | N Contigs | Largest Contig (bp) | N50    |
|-----|------------------|-------|---------|-------|------------|----------------|----------------|--------|--------|----------|------------------------|----------|--------------------------|-----------|---------------------|--------|
| P1  | 4306274          | 28.73 | 4119    | 4034  | 753        | 74             | 7101           | 70     | 14     | 12       | 3.60                   | 83.5%    | 937                      | 142       | 679621              | 107246 |
| P2  | 4357743          | 28.62 | 4074    | 4004  | 768        | 74             | 7101           | 58     | 11     | 12       | 3.61                   | 82.9%    | 919                      | 100       | 785945              | 111724 |
| P3  | 4375492          | 28.75 | 4106    | 4020  | 759        | 63             | 7101           | 70     | 15     | 12       | 3.60                   | 82.2%    | 919                      | 196       | 414802              | 75262  |
| P4  | 4393795          | 28.75 | 4069    | 3986  | 756        | 74             | 7101           | 67     | 15     | 11       | 3.54                   | 80.7%    | 907                      | 184       | 421420              | 68581  |
| P5  | 4366415          | 29.12 | 4305    | 4248  | 744        | 74             | 8133           | 42     | 14     | 11       | 3.75                   | 85.8%    | 973                      | 289       | 940433              | 38916  |
| P6  | 4175123          | 28.63 | 3792    | 3748  | 786        | 74             | 8133           | 32     | 11     | 13       | 3.44                   | 82.4%    | 898                      | 152       | 289992              | 73148  |
| P7  | 4293431          | 29.19 | 4261    | 4204  | 741        | 74             | 8133           | 41     | 15     | 10       | 3.68                   | 85.6%    | 979                      | 360       | 679500              | 33918  |
| P8  | 4216883          | 29.46 | 4175    | 4120  | 690        | 74             | 8133           | 41     | 13     | 9        | 3.59                   | 85.0%    | 977                      | 401       | 730980              | 19469  |
| P9  | 4397662          | 29.28 | 4127    | 4070  | 717        | 74             | 7680           | 44     | 12     | 10       | 3.57                   | 81.1%    | 925                      | 390       | 748992              | 32136  |
| P10 | 4245597          | 28.88 | 3870    | 3793  | 768        | 74             | 7959           | 62     | 14     | 11       | 3.45                   | 81.3%    | 893                      | 321       | 526705              | 31341  |
| P11 | 4324910          | 29.15 | 3906    | 3840  | 738        | 74             | 8133           | 51     | 14     | 11       | 3.43                   | 79.4%    | 888                      | 422       | 540246              | 26246  |
| P12 | 4303866          | 28.39 | 4044    | 3967  | 768        | 74             | 7101           | 63     | 13     | 11       | 3.58                   | 83.2%    | 922                      | 64        | 1036193             | 201820 |
| P13 | 4242084          | 28.38 | 3932    | 3883  | 777        | 74             | 7101           | 41     | 7      | 11       | 3.53                   | 83.3%    | 915                      | 61        | 1399922             | 234188 |
| P14 | 4246188          | 28.41 | 3913    | 3841  | 774        | 67             | 7101           | 59     | 12     | 10       | 3.50                   | 82.3%    | 905                      | 103       | 851845              | 112932 |
| P15 | 4316672          | 28.53 | 4017    | 3963  | 771        | 74             | 7101           | 42     | 11     | 12       | 3.56                   | 82.6%    | 918                      | 101       | 1429538             | 135018 |
| P16 | 4318597          | 28.65 | 4270    | 4207  | 702        | 74             | 8007           | 49     | 13     | 19       | 3.49                   | 80.9%    | 974                      | 259       | 233681              | 41795  |
| H1  | 4260101          | 28.64 | 3916    | 3822  | 777        | 71             | 7101           | 77     | 16     | 11       | 3.49                   | 81.9%    | 897                      | 110       | 688013              | 126300 |

| ID         | Genome size (bp) | GC%   | N genes | N CDS | CDS Length | Min CDS length | Max CDS length | N tRNA | N rRNA | N CRISPR | Total CDS Length (Mbp) | Coding % | Coding density (CDS/Mbp) | N Contigs | Largest Contig (bp) | N50    |
|------------|------------------|-------|---------|-------|------------|----------------|----------------|--------|--------|----------|------------------------|----------|--------------------------|-----------|---------------------|--------|
| H2         | 4343405          | 28.48 | 4074    | 4018  | 768        | 74             | 7101           | 43     | 12     | 10       | 3.62                   | 83.4%    | 925                      | 83        | 310868              | 139344 |
| H3         | 4159157          | 28.54 | 3834    | 3756  | 783        | 74             | 7101           | 65     | 12     | 13       | 3.44                   | 82.7%    | 903                      | 90        | 745387              | 184247 |
| H4         | 4171144          | 28.43 | 3825    | 3752  | 792        | 74             | 7101           | 59     | 13     | 10       | 3.48                   | 83.3%    | 900                      | 59        | 1317818             | 202408 |
| H5         | 4111116          | 28.5  | 3754    | 3671  | 786        | 72             | 7101           | 71     | 11     | 10       | 3.39                   | 82.4%    | 893                      | 92        | 517042              | 139312 |
| H6         | 4213817          | 28.42 | 3846    | 3792  | 789        | 74             | 7101           | 44     | 9      | 11       | 3.49                   | 82.8%    | 900                      | 70        | 782378              | 229392 |
| H7         | 4140387          | 28.43 | 3769    | 3705  | 792        | 74             | 7101           | 56     | 7      | 8        | 3.44                   | 83.0%    | 895                      | 65        | 651455              | 164735 |
| H8         | 4276164          | 28.44 | 3976    | 3901  | 765        | 74             | 7101           | 66     | 8      | 11       | 3.51                   | 82.2%    | 912                      | 119       | 455052              | 98541  |
| H9         | 4023709          | 28.33 | 3883    | 3821  | 783        | 74             | 7101           | 53     | 8      | 8        | 3.51                   | 87.2%    | 950                      | 86        | 320737              | 109457 |
| H10        | 4321348          | 29.29 | 3976    | 3916  | 773        | 74             | 8007           | 46     | 13     | 17       | 3.55                   | 82.2%    | 906                      | 64        | 601448              | 209929 |
| H11        | 4188619          | 28.56 | 3845    | 3766  | 777        | 74             | 7101           | 65     | 13     | 13       | 3.43                   | 81.9%    | 899                      | 127       | 356540              | 84471  |
| H12        | 4092688          | 28.49 | 3888    | 3824  | 750        | 74             | 7101           | 51     | 12     | 12       | 3.36                   | 82.2%    | 934                      | 120       | 242455              | 71487  |
| H13        | 4240966          | 28.49 | 3896    | 3815  | 780        | 74             | 7101           | 65     | 15     | 11       | 3.49                   | 82.4%    | 900                      | 98        | 547759              | 107981 |
| H14        | 4261108          | 28.74 | 3872    | 3799  | 774        | 66             | 7101           | 61     | 11     | 12       | 3.45                   | 81.0%    | 892                      | 174       | 529871              | 77959  |
| H15        | 4159033          | 28.53 | 3820    | 3751  | 786        | 74             | 7101           | 57     | 11     | 13       | 3.44                   | 82.8%    | 902                      | 85        | 1519890             | 199533 |
| H16        | 4181626          | 28.76 | 3782    | 3722  | 768        | 74             | 8133           | 41     | 18     | 11       | 3.42                   | 81.7%    | 890                      | 168       | 326021              | 73022  |
| H17        | 4175123          | 28.63 | 4047    | 3972  | 702        | 68             | 8133           | 52     | 22     | 13       | 3.55                   | 85.0%    | 951                      | 152       | 297923              | 73148  |
| H18        | 4201620          | 28.86 | 3806    | 3745  | 762        | 71             | 8133           | 41     | 19     | 13       | 3.44                   | 81.9%    | 891                      | 184       | 487487              | 51608  |
| H19        | 4318953          | 28.95 | 4032    | 3965  | 753        | 74             | 8133           | 53     | 13     | 12       | 3.49                   | 80.9%    | 918                      | 350       | 452553              | 27075  |
| H20        | 4304209          | 29.25 | 3885    | 3809  | 723        | 71             | 8877           | 53     | 22     | 13       | 3.45                   | 80.2%    | 885                      | 254       | 339779              | 45013  |
| H21        | 4284079          | 28.95 | 3877    | 3785  | 762        | 72             | 8133           | 66     | 25     | 10       | 3.52                   | 82.1%    | 884                      | 112       | 444046              | 125344 |
| H22        | 4106423          | 28.69 | 3733    | 3663  | 780        | 74             | 7101           | 57     | 12     | 10       | 3.33                   | 81.0%    | 892                      | 398       | 296973              | 21492  |
| H23        | 4259443          | 29.3  | 3800    | 3731  | 738        | 72             | 8133           | 42     | 26     | 11       | 3.43                   | 80.5%    | 876                      | 164       | 671044              | 101677 |
| H24        | 4205942          | 29.12 | 3728    | 3654  | 765        | 72             | 8133           | 49     | 24     | 10       | 3.44                   | 81.7%    | 869                      | 152       | 776075              | 135789 |
| Ox1533     | 4266433          | 28.26 | 3933    | 3866  | 783        | 74             | 8577           | 53     | 13     | 12       | 3.53                   | 82.7%    | 906                      | 82        | 464892              | 104490 |
| Ox593      | 4257373          | 28.5  | 3980    | 3914  | 770        | 74             | 7101           | 53     | 12     | 12       | 3.53                   | 82.8%    | 919                      | 59        | 906054              | 19178  |
| Ox1475     | 4302598          | 28.77 | 4001    | 3933  | 780        | 74             | 7101           | 53     | 14     | 11       | 3.59                   | 83.3%    | 914                      | 385       | 492254              | 18427  |
| ATCC 43600 | 4202469          | 28.58 | 3863    | 3816  | 789        | 74             | 8007           | 32     | 14     | 14       | 3.50                   | 83.2%    | 908                      | 27        | 1854258             | 564956 |
