# Supplementary material for: Genome Analysis of Clostridium difficile PCR Ribotype 014 Lineage in Australian Pigs and Humans Reveals a Diverse Genetic Repertoire and Signatures of Long-Range Interspecies Transmission
Source: PubMed Central journal article supplement (PMC5225093; doi:10.3389/fmicb.2016.02138), 2017-01-11
Supplement: Table2.pdf [file Table2.pdf]

## Supplementary Material

**Knight DR\*, Squire MM, Collins DA and Riley TV (2016).** Genome analysis of *Clostridium difficile* PCR ribotype 014 lineage in Australian pigs and humans reveals a diverse genetic repertoire and signatures of long-range interspecies transmission. *Front. Microbiol.* **7**:2138. doi: 10.3389/fmicb.2016.02138

\*Correspondence: Daniel R. Knight; [daniel.knight@uwa.edu.au](mailto:daniel.knight@uwa.edu.au)

**Supplementary Table 2 | Summary of complete prophages detected in *C. difficile* RT014 genomes, n=44**

| Genome | Origin  | ST | Most Common Prophage     | Score <sup>†</sup> | Length (Kb) | N ORFs | GC%   |
|--------|---------|----|--------------------------|--------------------|-------------|--------|-------|
| P1     | Porcine | 13 | Clostr_ΦC2_NC_009231     | 150                | 40.8        | 83     | 32.11 |
| P1     | Porcine | 13 | Clostr_ΦMMP02_NC_019421  | 150                | 57.3        | 90     | 29.85 |
| P2     | Porcine | 13 | Clostr_ΦC2_NC_009231     | 100                | 16.6        | 29     | 30.13 |
| P3     | Porcine | 13 | Clostr_ΦC2_NC_009231     | 150                | 105.7       | 143    | 27.77 |
| P3     | Porcine | 13 | Clostr_ΦC2_NC_009231     | 100                | 21.4        | 32     | 34.20 |
| P3     | Porcine | 13 | Clostr_ΦMMP02_NC_019421  | 150                | 72.7        | 114    | 30.35 |
| P5     | Porcine | 49 | Clostr_CDMH1_NC_024144   | 150                | 80.0        | 101    | 28.74 |
| P5     | Porcine | 49 | Clostr_ΦC2_NC_009231     | 130                | 50.5        | 70     | 30.06 |
| P5     | Porcine | 49 | Clostr_ΦCD6356_NC_015262 | 150                | 87.6        | 106    | 29.59 |
| P5     | Porcine | 49 | Clostr_ΦMMP02_NC_019421  | 100                | 27.4        | 29     | 31.67 |
| P7     | Porcine | 49 | Clostr_CDMH1_NC_024144   | 100                | 17.6        | 29     | 29.49 |
| P7     | Porcine | 49 | Clostr_ΦC2_NC_009231     | 150                | 51.7        | 79     | 28.83 |
| P7     | Porcine | 49 | Clostr_ΦC2_NC_009231     | 100                | 46.7        | 53     | 29.61 |
| P7     | Porcine | 49 | Clostr_ΦCD6356_NC_015262 | 150                | 59.7        | 80     | 29.82 |
| P7     | Porcine | 49 | Clostr_ΦMMP02_NC_019421  | 150                | 94.1        | 103    | 32.73 |
| P8     | Porcine | 49 | Clostr_ΦCD6356_NC_015262 | 150                | 59.9        | 74     | 31.33 |
| P8     | Porcine | 49 | Clostr_ΦMMP02_NC_019421  | 150                | 89.0        | 116    | 29.36 |
| P9     | Porcine | 49 | Clostr_CDMH1_NC_024144   | 110                | 31.1        | 37     | 29.06 |
| P9     | Porcine | 49 | Clostr_ΦCD27_NC_011398   | 100                | 32.1        | 37     | 29.99 |
| P9     | Porcine | 49 | Clostr_ΦCD6356_NC_015262 | 150                | 54.2        | 66     | 28.05 |
| P9     | Porcine | 49 | Clostr_ΦMMP02_NC_019421  | 100                | 70.6        | 87     | 27.08 |
| P10    | Porcine | 13 | Clostr_ΦC2_NC_009231     | 150                | 73.9        | 101    | 29.16 |
| P11    | Porcine | 13 | Clostr_ΦC2_NC_009231     | 110                | 30.1        | 56     | 31.61 |
| P12    | Porcine | 13 | Clostr_ΦC2_NC_009231     | 150                | 41.9        | 59     | 28.78 |
| P12    | Porcine | 13 | Clostr_ΦCD6356_NC_015262 | 150                | 67.5        | 110    | 29.60 |
| P12    | Porcine | 13 | Clostr_ΦMMP02_NC_019421  | 150                | 39.0        | 46     | 30.18 |
| P13    | Porcine | 13 | Clostr_ΦC2_NC_009231     | 150                | 41.9        | 59     | 28.78 |
| P13    | Porcine | 13 | Clostr_ΦCD6356_NC_015262 | 150                | 49.9        | 80     | 29.25 |
| P13    | Porcine | 13 | Clostr_ΦMMP02_NC_019421  | 150                | 47.4        | 68     | 29.42 |
| P14    | Porcine | 13 | Clostr_ΦC2_NC_009231     | 150                | 41.9        | 58     | 28.78 |
| P14    | Porcine | 13 | Clostr_ΦMMP02_NC_019421  | 150                | 64.8        | 77     | 30.32 |
| P15    | Porcine | 13 | Clostr_CDMH1_NC_024144   | 100                | 17.2        | 30     | 30.27 |
| P15    | Porcine | 13 | Clostr_ΦC2_NC_009231     | 130                | 34.0        | 51     | 30.20 |

| Genome    | Origin  | ST | Most Common Prophage     | Score <sup>†</sup> | Length (Kb) | N ORFs | GC%   |
|-----------|---------|----|--------------------------|--------------------|-------------|--------|-------|
| P15       | Porcine | 13 | Clostr_ΦC2_NC_009231     | 120                | 49.6        | 49     | 29.13 |
| P15       | Porcine | 13 | Clostr_ΦC2_NC_009231     | 110                | 24.8        | 43     | 29.55 |
| P16       | Porcine | 2  | Clostr_ΦC2_NC_009231     | 140                | 24.3        | 40     | 29.74 |
| P16       | Porcine | 2  | Clostr_ΦMMP02_NC_019421  | 110                | 53.0        | 76     | 30.35 |
| H1        | Human   | 13 | Clostr_ΦC2_NC_009231     | 150                | 48.7        | 78     | 28.85 |
| H2        | Human   | 2  | Clostr_ΦC2_NC_009231     | 150                | 56.7        | 89     | 28.57 |
| H2        | Human   | 2  | Clostr_ΦCD27_NC_011398   | 150                | 32.9        | 57     | 28.77 |
| H2        | Human   | 2  | Clostr_ΦCD6356_NC_015262 | 150                | 96.6        | 108    | 28.75 |
| H3        | Human   | 2  | Clostr_CDMH1_NC_024144   | 100                | 12.2        | 18     | 29.33 |
| H3        | Human   | 2  | Clostr_ΦC2_NC_009231     | 130                | 39.4        | 63     | 31.16 |
| H5        | Human   | 2  | Clostr_ΦC2_NC_009231     | 150                | 72.5        | 95     | 28.39 |
| H6        | Human   | 13 | Clostr_ΦC2_NC_009231     | 150                | 56.5        | 88     | 28.53 |
| H8        | Human   | 49 | Clostr_CDMH1_NC_024144   | 120                | 28.6        | 30     | 28.89 |
| H8        | Human   | 49 | Clostr_ΦC2_NC_009231     | 130                | 63.8        | 73     | 29.81 |
| H8        | Human   | 49 | Clostr_ΦC2_NC_009231     | 150                | 103.7       | 125    | 30.37 |
| H9        | Human   | 2  | Clostr_ΦMMP02_NC_019421  | 150                | 50.7        | 76     | 28.74 |
| H9        | Human   | 2  | Clostr_ΦSM101_NC_008265  | 100                | 29.9        | 30     | 26.67 |
| H10       | Human   | 2  | Clostr_ΦC2_NC_009231     | 100                | 34.8        | 61     | 28.09 |
| H11       | Human   | 2  | Clostr_CDMH1_NC_024144   | 140                | 51.8        | 74     | 30.99 |
| H11       | Human   | 2  | Clostr_ΦC2_NC_009231     | 150                | 67.8        | 108    | 31.26 |
| H12       | Human   | 2  | Clostr_ΦC2_NC_009231     | 100                | 34.7        | 64     | 28.16 |
| H13       | Human   | 13 | Clostr_ΦC2_NC_009231     | 150                | 48.7        | 77     | 28.85 |
| H14       | Human   | 2  | Clostr_ΦCD27_NC_011398   | 110                | 51.6        | 77     | 29.04 |
| H15       | Human   | 2  | Clostr_CDMH1_NC_024144   | 130                | 16.9        | 26     | 29.44 |
| H19       | Human   | 13 | Clostr_ΦC2_NC_009231     | 120                | 52.2        | 77     | 37.37 |
| H19       | Human   | 13 | Clostr_ΦC2_NC_009231     | 100                | 22.5        | 38     | 30.11 |
| H19       | Human   | 13 | Clostr_ΦMMP02_NC_019421  | 140                | 84.1        | 85     | 32.24 |
| H19       | Human   | 13 | Clostr_ΦMMP02_NC_019421  | 150                | 41.6        | 73     | 35.07 |
| H21       | Human   | 2  | Clostr_ΦC2_NC_009231     | 150                | 56.8        | 86     | 28.55 |
| H22       | Human   | 2  | Clostr_ΦC2_NC_009231     | 150                | 99.6        | 101    | 28.88 |
| H23       | Human   | 2  | Clostr_ΦC2_NC_009231     | 150                | 64.6        | 95     | 28.23 |
| H24       | Human   | 2  | Clostr_ΦC2_NC_009231     | 140                | 55.7        | 86     | 28.99 |
| Ox1475    | Human   | 2  | Clostr_ΦC2_NC_009231     | 150                | 101.2       | 130    | 27.12 |
| Ox1475    | Human   | 2  | Clostr_ΦC2_NC_009231     | 100                | 32.2        | 54     | 28.41 |
| Ox1475    | Human   | 2  | Clostr_ΦCD38_2_NC_015568 | 120                | 55.0        | 61     | 31.34 |
| Ox1533    | Human   | 13 | Clostr_ΦC2_NC_009231     | 140                | 44.0        | 73     | 28.12 |
| Ox893     | Human   | 49 | Clostr_CDMH1_NC_024144   | 110                | 27.3        | 39     | 28.80 |
| Ox893     | Human   | 49 | Clostr_ΦC2_NC_009231     | 150                | 108.2       | 157    | 29.97 |
| Ox893     | Human   | 49 | Clostr_ΦMMP02_NC_019421  | 150                | 89.4        | 133    | 29.10 |
| ATCC43600 | Human   | 2  | Clostr_ΦC2_NC_009231     | 120                | 16.9        | 23     | 29.60 |
| CD630     | Human   | 54 | Clostr_ΦC2               | 140                | 55.8        | 88     | 28.45 |
| CD630     | Human   | 54 | Clostr_ΦC2               | 140                | 57.3        | 68     | 29.45 |

CD630, RT012 reference strain (Genbank AM180355)

ORF, open reading frame

<sup>†</sup>, prophages were scored on the principle of completeness (see Methods)
